# Supplementary material
Source: PubMed Central journal article supplement (PMC9308132)
Supplement: mmc1.pdf [file mmc1.pdf]

**Cell Reports Methods, Volume 2**

**Supplemental information**

**Development of an efficient reproducible cell-cell  
transmission assay for rapid quantification  
of SARS-CoV-2 spike interaction with hACE2**

**George Ssenyange, Maya Kerfoot, Min Zhao, Shelli Farhadian, Sidi Chen, Lei Peng, Ping Ren, Charles S. Dela Cruz, Shaili Gupta, and Richard E. Sutton**

## **SUPPLEMENTAL INFORMATION**

### **SUPPLEMENTAL FIGURES AND LEGENDS**

**Figure S1. Neutralization curves for post-vaccine and convalescent sera showing inhibition of S pseudotyped particle infection.** Four-fold serial dilutions of convalescent (**A-C**) and post-vaccine (**E-G**) sera were pre-incubated with S pseudotyped particles for 1 h, then added to 293T-hACE2 target cells in triplicate. RLU was measured after 48 h, and IC-50 values calculated. One convalescent and one post-vaccine sample showed no significant inhibitory effect (**D & H**, respectively). Related to Figures 2, 3 and 5.

**Figure S2. Reproducibility of cell-cell transmission assay.** (**A-C**) Inhibition of cell-cell transmission by LCB1 performed 3 different times many weeks apart, IC-50 values were calculated for each experiment. (**D**) IC-50 values for the 3 experiments including the average IC-50 +/- SD. 1% DMSO in PBS was used as control. (**E, F**) Time-of-addition experiment using LCB1 to inhibit virus infection: 10-fold serial dilutions of LCB1 were added at -1, 0, +1 and +2 h relative to target cell addition. (**E**) pseudotyping; (**F**) cell-cell transmission. Related to Figure 6

**Figure S3. Effect of tetherin on virus infection.** Increasing amounts of tetherin plasmid DNA transfected into producer 293T cells (12-well plate for cell-cell transmission and 10 cm plate format for pseudotyping) inhibited cell-cell transmission of S (**A**) and VSV G (**B**), with a more profound inhibitory effect seen with pseudotyping with S (**B**) and VSV G (**D**), relative to cell-cell transmission. Effect of cholesterol derivatives on VSV G cell-cell transmission in transiently transfected cells: 10-fold serial dilutions of 25-hydroxycholesterol (**E**) and 27-hydroxycholesterol (**F**) were pre-incubated with VSV G-expressing producer cells for 1 hour; 293T target cells were then added, performed in triplicate, with RLU readout at 48 h. ns denotes not significant; \*p-value <0.05; \*\*p-value<0.01. Related to Figure 6.

**Figure S4. Studies with S variants of concern (VOC).** Serial dilutions of convalescent sera, post-vaccine sera, and peptide LCB1 were pre-incubated for 1 h with 293T producer cells transiently transfected with the different S VOC along with HIV-PV and

HIV-TV; 293T-hACE2 target cells were then added in triplicate and RLU measured at 48 h. **(A&C)** LCB1 inhibits cell-cell transmission of S VOC B.1.1.7 **(A)** and B.1.617.2 **(C)** but not B.1.351 **(B)**. **(D-F)** Convalescent sera inhibits cell-cell transmission of spike VOCs. **(G-I)** Post-vaccine sera inhibits cell-cell transmission of S VOCs. Related to Figures 2, 3 and 4.

**Figure S5. Immunoblotting and PCR of stable cell lines. (A-D)** Expression of S, HIV Gag, and hACE2 proteins in stable cell lines were confirmed by Western blotting, with GAPDH immunoblots performed in parallel. **(E)** Confirmation of presence of HIV-TV by PCR. Ethidium bromide-stained horizontal agarose gel showing PCR product to confirm stable introduction of HIV-TV (inGLUC) in the 293T-Spike-TV stable producer cell line. Nested PCR was performed on extracted genomic DNA from 293T cells transiently and stably expressing HIV-TV. Related to Figures 5 and 6

**Figure S6. Transduction of stable 293T cells with HDAd-HIV-PV. (A-B)** 293T-Spike-TV cells were transduced with increasing amounts HDAd-HIV-PV as indicated, performed in 12-well format, fixed, and stained using X-gal for lacZ expression. **(A)** Microscopy; **(B)** Photograph of actual plate. **(C)** Stable 293T-Spike-TV producer cells were transduced with indicated amounts of concentrated HDAd-HIV-PV; after 24 h cells were refed, co-cultured with 293T-hACE2 target cells in triplicate, and RLU measured after 48 h. **(D)** Stable 293T-Spike-TV producer cells were transduced HDAd-HIV-PV, at 48 h culture supernatant were harvested and used to transduce 293T-hACE2 target cells, pre-seeded the previous day in a separate plate, with indicated amounts of the supernatant and RLU measured at 48 h. Results normalized to  $\mu\text{L}/50,000$  target cells. A positive control with producer cells directly co-cultured with the targets was included. **(E)** Stable 293T-Spike-TV producer cells expressing different spike variants of concern, as indicated, were transduced with HDAd-HIV-PV; after 24 h cells were refed, co-cultured with 293T-hACE2 target cells in triplicate, and RLU measured after 48 h. Transduction and luciferase assays were performed in 3 independent experiments; the mean and SD are shown. Related to Figures 5 and 6.

Figure S1. Neutralization curves for post-vaccine and convalescent sera showing inhibition of S pseudotyped particle infection. Related to Figures 2, 3 and 5.

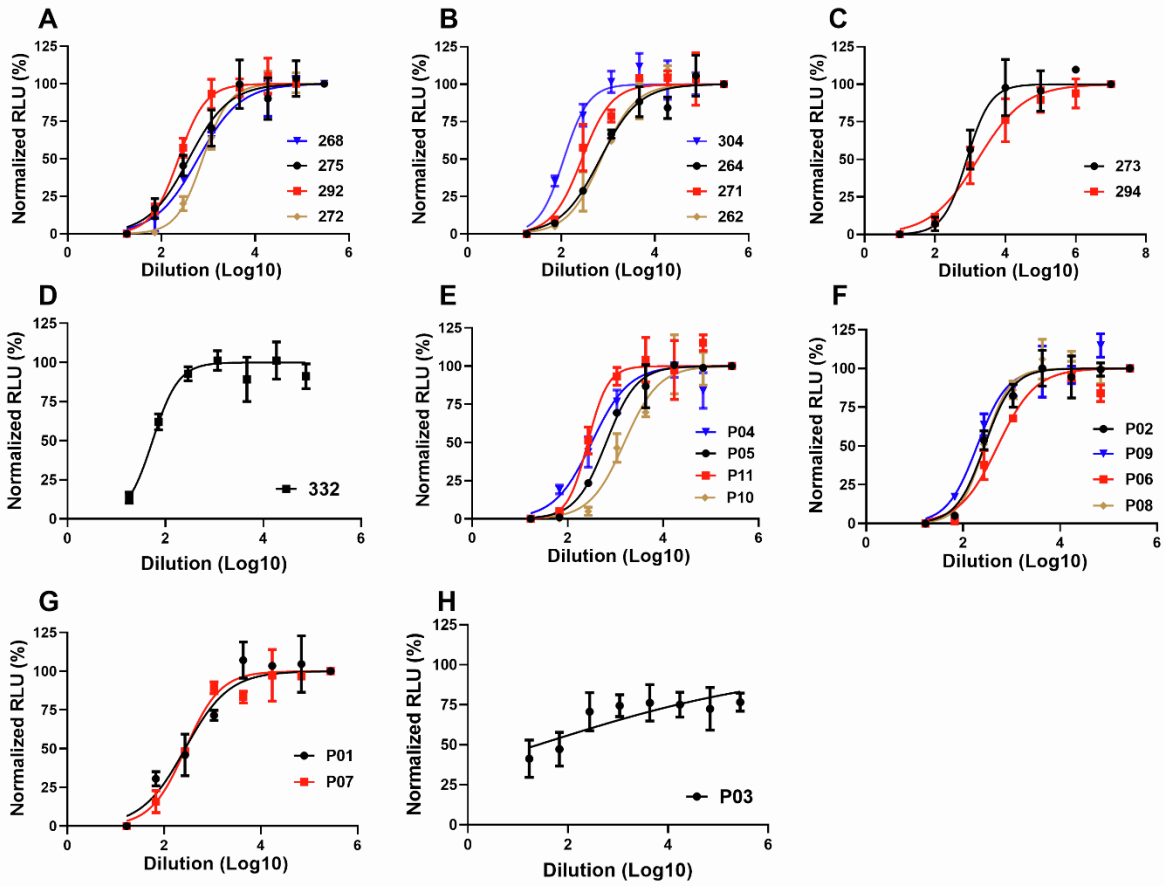

Figure S2. Reproducibility of cell-cell transmission assay. Related to Figure 6

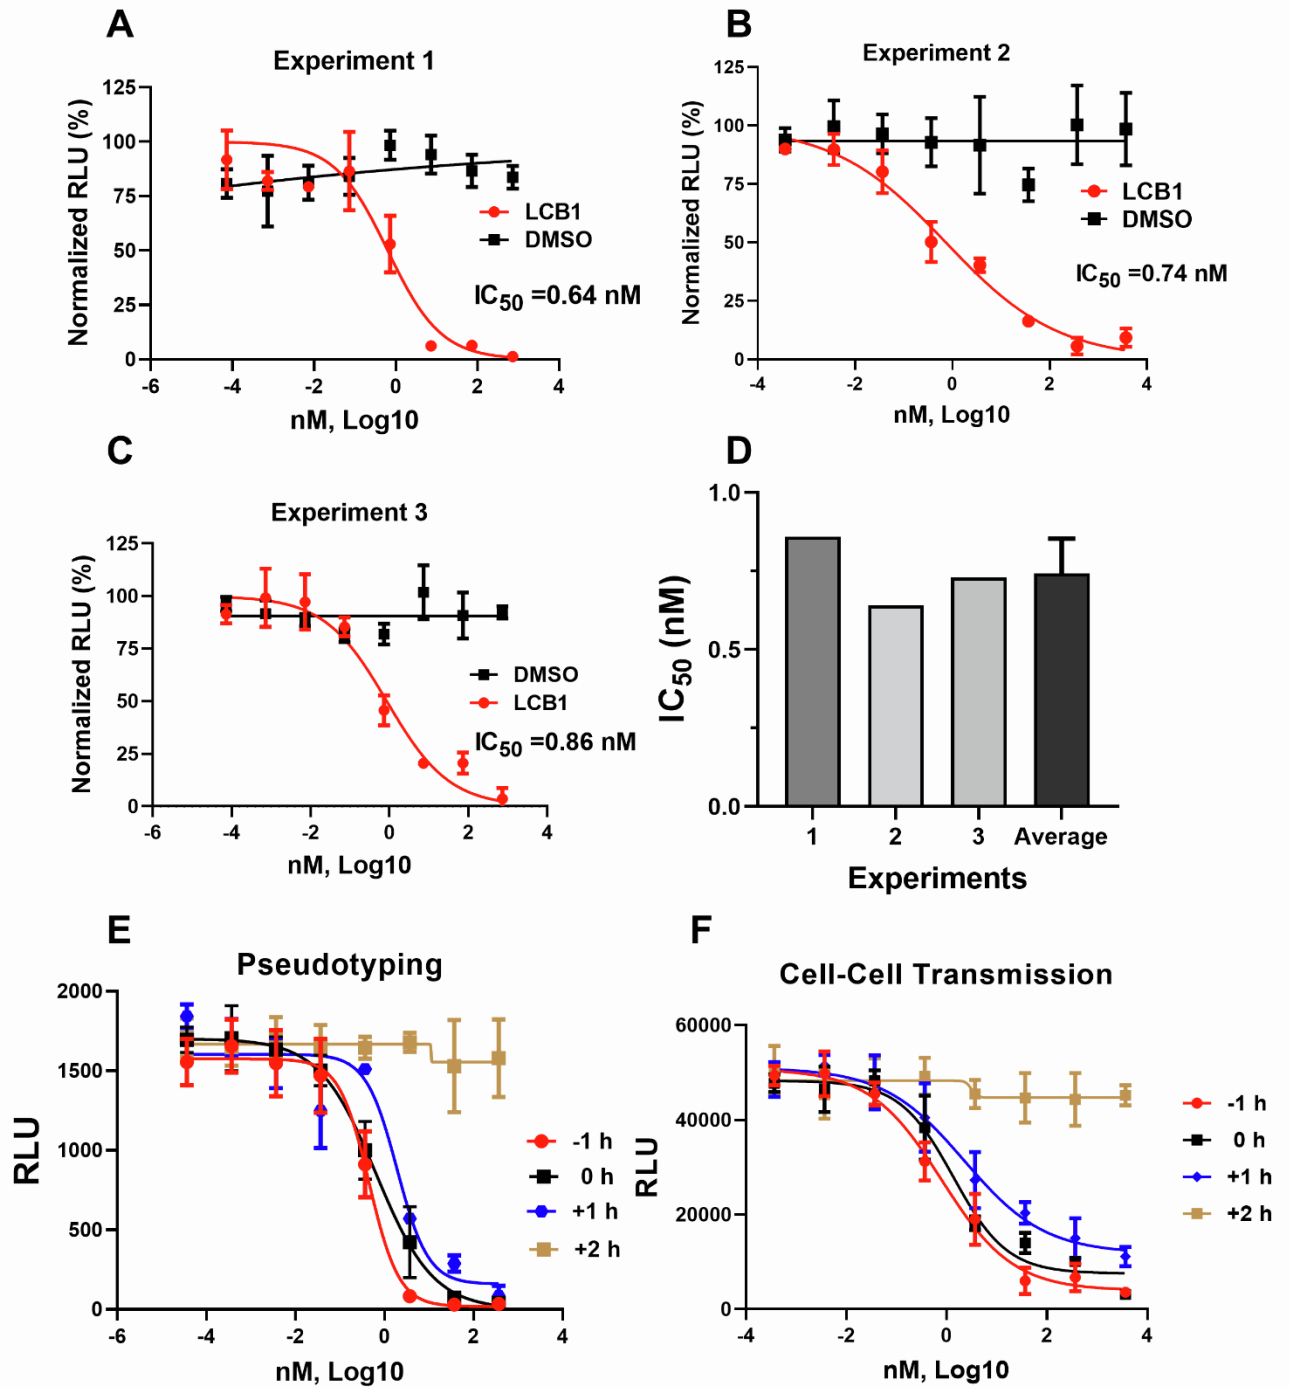

Figure S3. Effect of tetherin on virus infection. Related to Figure 6.

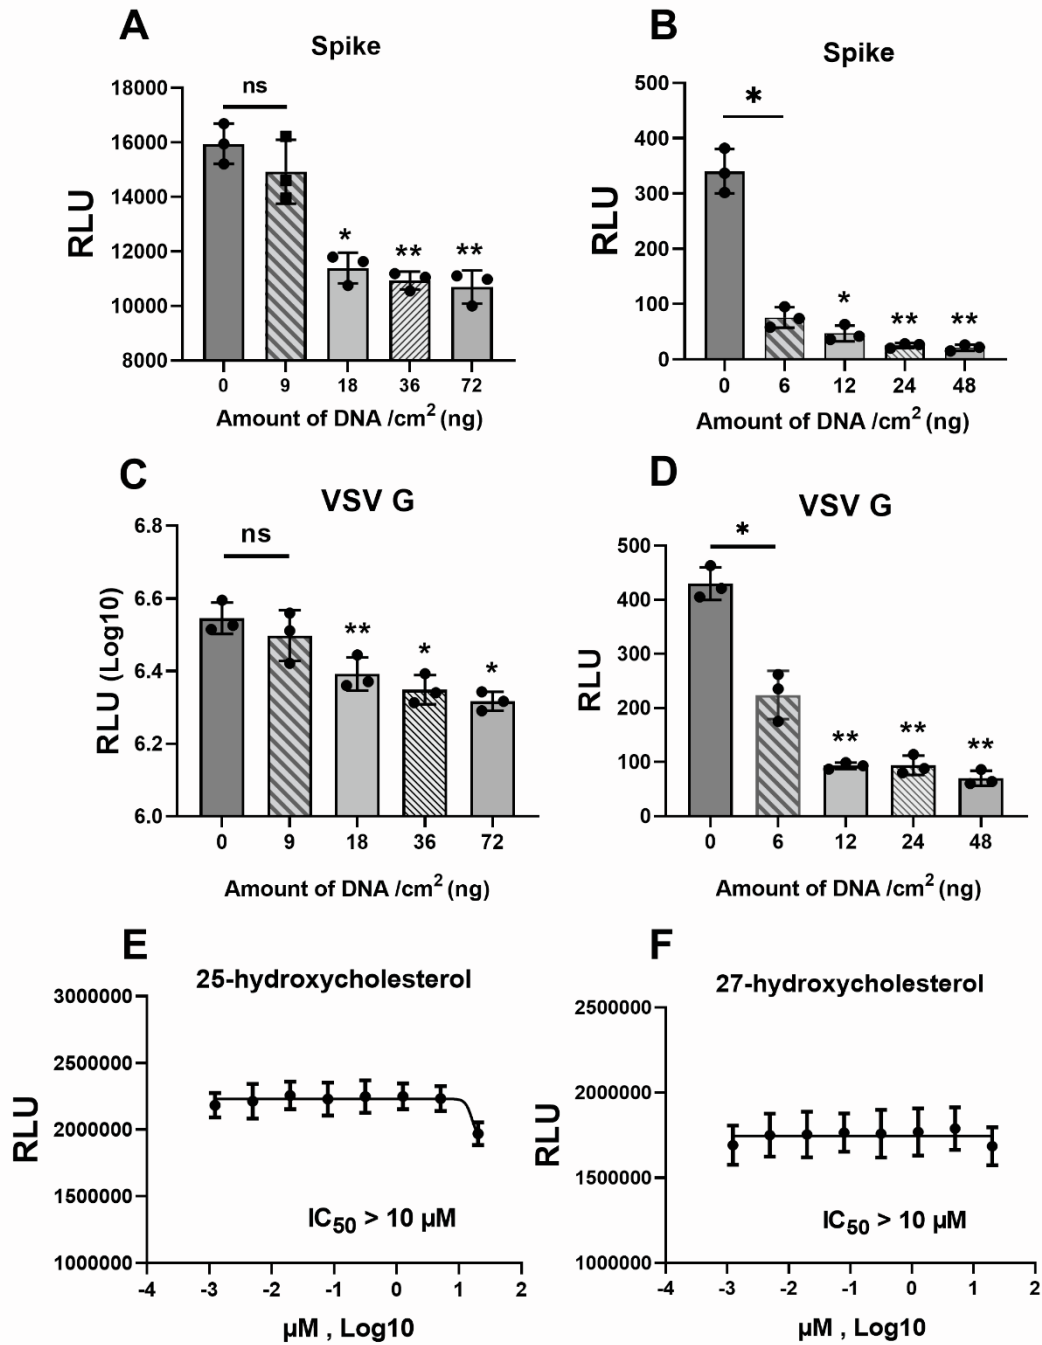

Figure S4. Studies with S variants of concern (VOC). Related to Figures 2, 3 and 4.

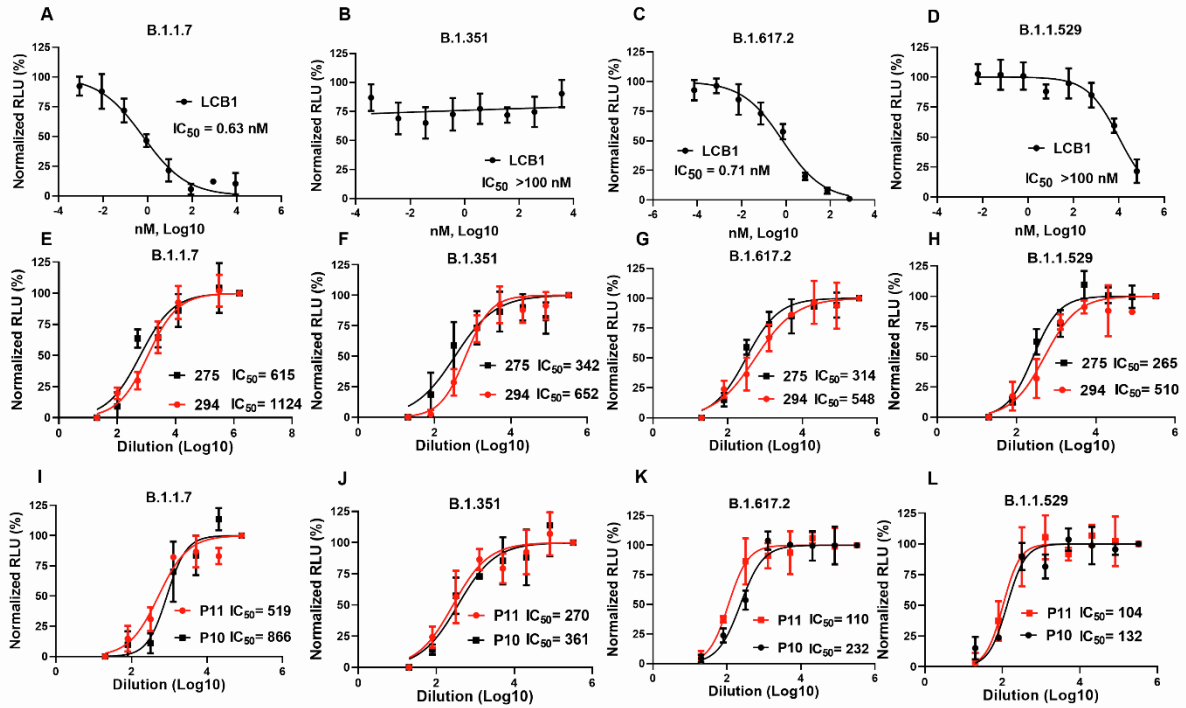

Figure S5. Immunoblotting and PCR of stable cell lines. Related to Figures 5 and 6.

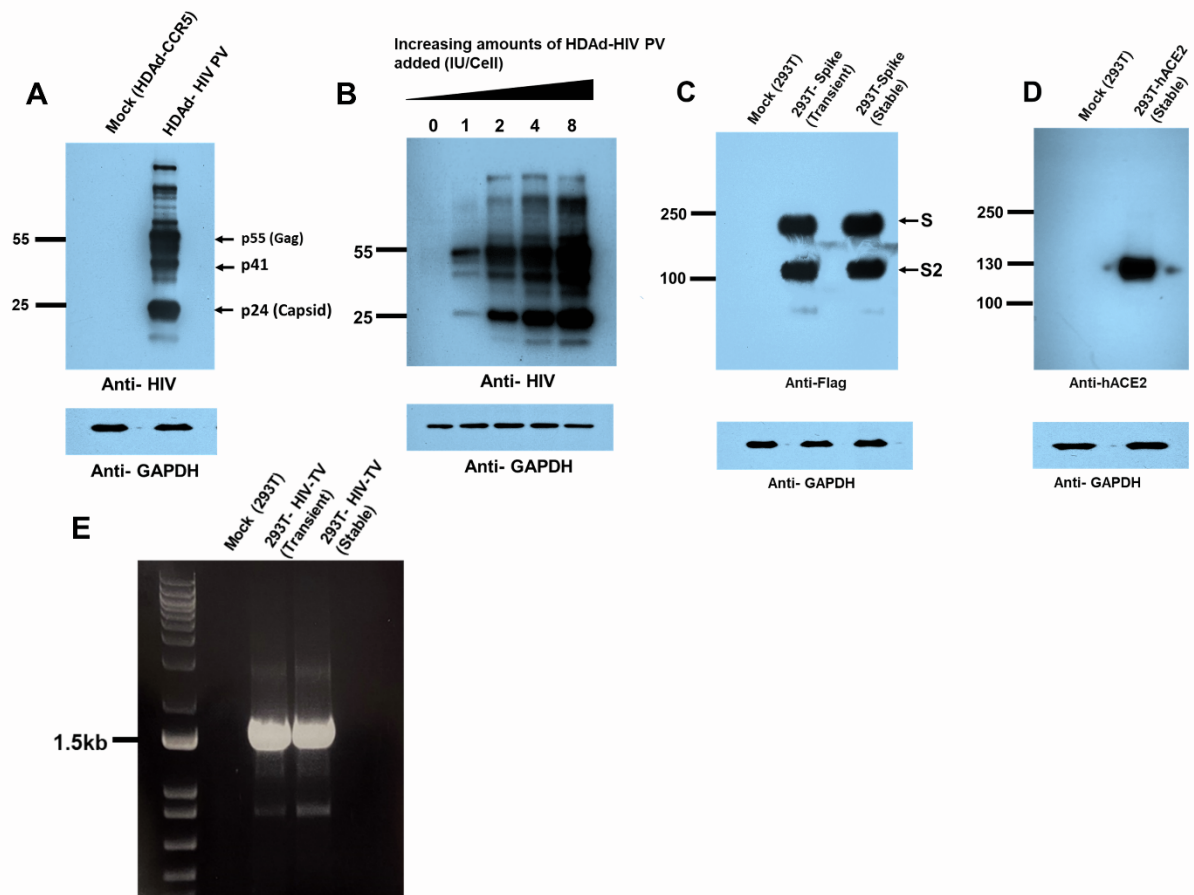



Figure S6. Transduction of stable 293T cells with HDAd-HIV-PV. Related to Figures 5 and 6.

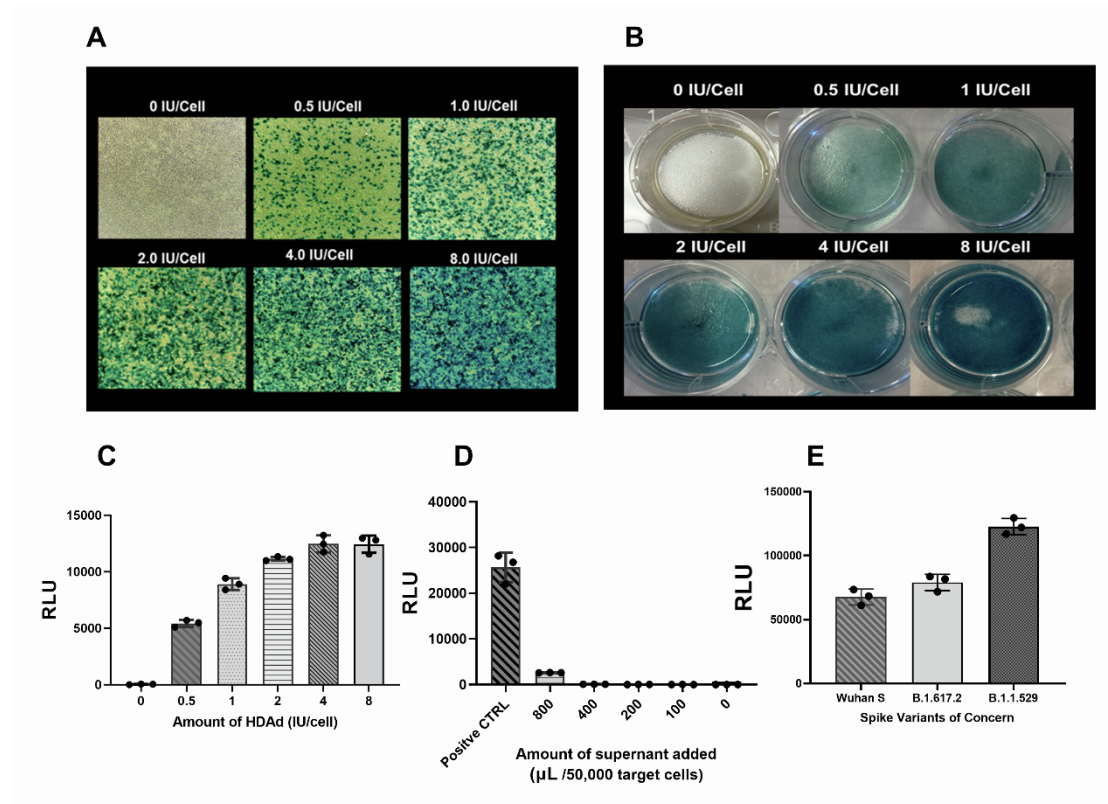

## SUPPLEMENTAL TABLES WITH TITLES

Table S1.

Demographic and relevant clinical information of the subjects from whom COVID-19 convalescent sera samples were collected. Related to Figure 2.

| Subject ID | Date of sample collection (after symptom onset) | Age | Sex | Race     | BMI <sup>a</sup> | Co-morbidities                       |                       |                     |                                       | Severity of disease |                        | Outcome                         |
|------------|-------------------------------------------------|-----|-----|----------|------------------|--------------------------------------|-----------------------|---------------------|---------------------------------------|---------------------|------------------------|---------------------------------|
|            |                                                 |     |     |          |                  | Chronic heart disease?               | Chronic lung disease? | High blood pressure | Other co-morbid conditions            | moderate            | severe                 |                                 |
| 262        | 21                                              | 50  | M   | hispanic | 42               |                                      |                       | +                   | diabetes                              |                     | Intubated <sup>d</sup> | deceased post 1 month           |
| 264        | 7                                               | 73  | M   | black    | 30               |                                      |                       | +                   |                                       | Floor <sup>c</sup>  |                        | D/C <sup>e</sup> post 1 month   |
| 268        | 8                                               | 40  | M   | asian    | 29               |                                      |                       |                     |                                       | Floor <sup>c</sup>  |                        | D/C <sup>e</sup> at 1 week      |
| 271        | 10                                              | 95  | F   | white    | 27               |                                      |                       | +                   | GERD <sup>j</sup> , hypothyroidism    | Floor <sup>c</sup>  |                        | Deceased post 1 month           |
| 272        | 4                                               | 76  | M   | white    | 34               |                                      |                       | +                   | diabetes                              | Floor <sup>c</sup>  |                        | D/C <sup>e</sup> after 2 days   |
| 273        | 3                                               | 66  | F   | black    | 37               | Afib <sup>f</sup> , CHF <sup>b</sup> | COPD <sup>i</sup>     | +                   |                                       |                     | Intubated <sup>d</sup> | D/C after 1 month               |
| 275        | 11                                              | 86  | M   | hispanic | 25               |                                      |                       |                     | Diabetes, Alzheimer's dementia        | Floor <sup>c</sup>  |                        | D/C <sup>e</sup> after 1 week   |
| 292        | 5                                               | 69  | M   | black    | 27               |                                      |                       | +                   |                                       | Floor <sup>c</sup>  |                        | D/C <sup>e</sup> after 1 week   |
| 294        | 12                                              | 65  | M   | white    | 46               |                                      | COPD <sup>i</sup>     | +                   | Diabetes, Hx PE <sup>k</sup>          |                     | Intubated <sup>d</sup> | D/C <sup>e</sup> after 2 months |
| 304        | 16                                              | 59  | M   | Black    | 16               |                                      |                       |                     | Hx pancreatitis, alcohol use disorder |                     | Intubated <sup>d</sup> | D/C <sup>e</sup> after 3 weeks  |

|     |   |    |   |       |    |                  |                                         |   |                                     |  |                    |                             |
|-----|---|----|---|-------|----|------------------|-----------------------------------------|---|-------------------------------------|--|--------------------|-----------------------------|
| 332 | 8 | 94 | F | black | 36 | CHF <sup>b</sup> | COPD <sup>i</sup> ,<br>OSA <sup>g</sup> | + | Breast cancer,<br>GERD <sup>j</sup> |  | Bipap <sup>h</sup> | Deceased<br>after 6<br>days |
|-----|---|----|---|-------|----|------------------|-----------------------------------------|---|-------------------------------------|--|--------------------|-----------------------------|

**Footnotes:**

<sup>a</sup>BMI denotes body mass index

<sup>b</sup>CHF denotes congestive heart failure

<sup>c</sup>Floor denotes subject remained on a regular in-patient unit

<sup>d</sup>Intubated denotes subject was endotracheally intubated in the intensive care unit

<sup>e</sup>D/C denotes discharge from the hospital

<sup>f</sup>Afib denotes atrial fibrillation

<sup>g</sup>OSA denotes obstructive sleep apnea

<sup>h</sup>BIPAP denotes subject required Bilevel Positive Airway Pressure required but not endotracheal intubation

<sup>i</sup>COPD denotes chronic obstructive pulmonary disease

<sup>j</sup>GERD denotes Gastroesophageal reflux disease

<sup>k</sup>PE denotes pulmonary embolism

Table S2.

Demographic and relevant clinical information of the subjects from whom post-vaccine sera samples were collected. Related to Figures 3 & 5.

| Subject ID* | Age | Sex | Race/Ethnicity | BMI <sup>a</sup> | Co-morbidities         |                       |                            |
|-------------|-----|-----|----------------|------------------|------------------------|-----------------------|----------------------------|
|             |     |     |                |                  | Chronic heart disease? | Chronic lung disease? | Other co-morbid conditions |
| P01         | 65  | F   | white          | 27.4             | CAD <sup>b</sup>       | COPD <sup>c</sup>     |                            |
| P02         | 63  | M   | white          | 23.3             |                        |                       | Hypertension               |
| P03         | 57  | F   | white          | 34.1             |                        |                       | Diabetes                   |
| P04         | 56  | F   | white          | 26.5             |                        |                       |                            |
| P05         | 63  | M   | white          | 29.5             |                        |                       |                            |
| P06         | 56  | F   | white          | 29.2             |                        |                       |                            |
| P07         | 38  | F   | white          | 27.4             |                        |                       |                            |
| P08         | 46  | M   | white          | 28.1             |                        |                       |                            |
| P09         | 31  | F   | white-hispanic | 23.4             |                        |                       |                            |
| P10         | 55  | F   | white-hispanic | 32.1             |                        |                       |                            |
| P11         | 40  | F   | Asian          | 19.3             |                        |                       |                            |

**Footnotes:**

<sup>a</sup>BMI denotes body mass index

<sup>b</sup>CAD denotes coronary artery disease

<sup>c</sup>COPD denotes chronic obstructive pulmonary disease

\*All subjected received the Pfizer vaccine one month prior to blood draw
